# Supplementary material
Source: Springer Nature journal article supplement (https://www.springermedizin.de/resource/supplementary/12885_2007_1029_MOESM2_ESM.pdf/9471956)
Supplement: MOESM2 [file 9471956]

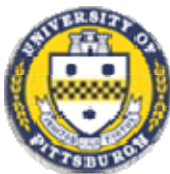

# University of Pittsburgh

## *Institutional Review Board*

3500 Fifth Avenue  
Ground Level  
Pittsburgh, PA 15213  
(412) 383-1480  
(412) 383-1508 (fax)

### MEMORANDUM

TO: Michael J. Becich, M.D.

FROM: Richard Guido, M.D., Chair 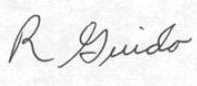

DATE: September 13, 2006

SUBJECT: IRB #0608194: National Mesothelioma Virtual Registry and Tissue Bank (U19)  
(Mesothelioma Virtual Bank for Translational Research)

---

The above-referenced proposal has received expedited review and approval from the Institutional Review Board under 45 CFR 46.110 (5).

If applicable, please include the following information in the upper right-hand corner of all pages of the consent form:

Approval Date: September 13, 2006  
Renewal Date: September 12, 2007  
University of Pittsburgh  
Institutional Review Board  
IRB #0608194

Please note that it is the investigator's responsibility to report to the IRB any unanticipated problems involving risks to subjects or others [see 45 CFR 46.103(b)(5) and 21 CFR 56.108(b)]. The IRB Reference Manual (Chapter 3, Section 3.3) describes the reporting requirements for unanticipated problems which include, but are not limited to, adverse events. If you have any questions about this process, please contact the Adverse Events Coordinator at 412-383-1504.

The protocol and consent forms, along with a brief progress report must be resubmitted at least **one month prior** to the renewal date noted above as required by FWA00006790 (University of Pittsburgh), FWA00006735 (University of Pittsburgh Medical Center), FWA00000600 (Children's Hospital of Pittsburgh), FWA00003567 (Magee-Womens Health Corporation), FWA00003338 (University of Pittsburgh Medical Center Cancer Institute).

**Please be advised that your research study may be audited periodically by the University of Pittsburgh Research Conduct and Compliance Office.**

RG:kh
